# Supplementary material for: Contracted but effective: production of enantiopure 2,3-butanediol by thermophilic and GRAS Bacillus licheniformis
Source: Royal Society of Chemistry journal article supplement (doi:10.1039/c6gc01023g), 2016-01-01
Supplement: c6gc01023g1.pdf [file c6gc01023g1.pdf]

## Supporting information

### **Contracted but effective: production of enantiopure 2,3- butanediol by thermophilic and GRAS *Bacillus licheniformis***

Yongsheng Ge <sup>a, §</sup>, Kun Li <sup>a, §</sup>, Lixiang Li <sup>a, b</sup>, Chao Gao <sup>a, \*</sup>, Lijie Zhang <sup>a</sup>, Cuiqing Ma <sup>a, \*\*</sup>, and Ping Xu <sup>b</sup>

<sup>a</sup> State Key Laboratory of Microbial Technology, Shandong University, Jinan 250100, China

<sup>b</sup> State Key Laboratory of Microbial Metabolism, Shanghai Jiao Tong University, Shanghai 200240, China

§ These authors contributed equally to this work.

\*\*Corresponding author: Fax: +8653188369463.

\*Corresponding author: Fax: +8653188364003.

E-mail addresses: macq@sdu.edu.cn (C. Ma), jieerbu@sdu.edu.cn (C. Gao).

**Table S1** Primers used in this work

| Primer <sup>a</sup>       | Sequence (5'-3') <sup>b</sup>            | Use                                                  |
|---------------------------|------------------------------------------|------------------------------------------------------|
| <i>EbudC</i> -f           | AAAGAATTCGTTAATTAAATACCATTCCGC           | Amplification of <i>budC</i>                         |
| <i>EbudC</i> -r           | AAAGTCGACATGAGTAAAGTATCTGGAAA            | Amplification of <i>budC</i>                         |
| $\Delta$ <i>budC</i> -L-f | AAACCATGGAATAAACGAGTTGACGGAAA            | Amplification of left homologous arm of <i>budC</i>  |
| $\Delta$ <i>budC</i> -L-r | GCAAAGCAATTGCGGTTAAATTGCATTAACGCTTATCC   | Amplification of left homologous arm of <i>budC</i>  |
| $\Delta$ <i>budC</i> -R-f | GGATAAGCGTTTTAATGCAATTTAACCGCAATTGCTTTGC | Amplification of right homologous arm of <i>budC</i> |
| $\Delta$ <i>budC</i> -R-r | TTTGGATCCTATGCTCGCGGTGTTCTAT             | Amplification of right homologous arm of <i>budC</i> |
| <i>Egdh</i> -f            | AAAGGATCCATGTCAAATCAGTAAAATCAG           | Amplification of <i>gdh</i>                          |
| <i>Egdh</i> -r            | TTTAAGCTTTTAATCGTGATAAGATTCTGC           | Amplification of <i>gdh</i>                          |
| $\Delta$ <i>gdh</i> -L-f  | ATTTAGATCTAACAAGCCGCGTCATTCAAG           | Amplification of left homologous arm of <i>gdh</i>   |
| $\Delta$ <i>gdh</i> -L-r  | ACTTGGCGCCATTCTTCTTCGACACATCGCAAATGATA   | Amplification of left homologous arm of <i>gdh</i>   |
| $\Delta$ <i>gdh</i> -R-f  | TATCATTTGCGATGTGTCGAAGAAGAATGGCGCCAAGT   | Amplification of right homologous arm of <i>gdh</i>  |
| $\Delta$ <i>gdh</i> -R-r  | GGAGTACCGTGGATCCGCTTTAAG                 | Amplification of right homologous arm of <i>gdh</i>  |

<sup>a</sup> “f” of primer name means the sense primer; “r” of primer name means antisense primers; “L” of primer name means the left homologous arm



**Table S2** Microbial production of (2*R*,3*R*)-2,3-BD.

| Strain                                | Concentration<br>(g/L) | Yield<br>(g/g)  | Productivity<br>(g/[L h]) | Reference |
|---------------------------------------|------------------------|-----------------|---------------------------|-----------|
| <i>Paenibacillus polymyxa</i>         | 111.0                  | ND <sup>a</sup> | 2.1                       | 1         |
| <i>Escherichia coli</i>               | 6.1                    | 0.31            | 0.13                      | 2         |
| <i>Clostridium<br/>acetobutylicum</i> | 1.98                   | 0.45            | 0.01                      | 3         |
| <i>E. coli</i>                        | 9.54                   | 0.34            | 0.20                      | 4         |
| <i>Saccharomyces<br/>cerevisiae</i>   | 43.6                   | 0.227           | 0.2                       | 5         |
| <i>S. cerevisiae</i>                  | 100.0                  | 0.35            | 0.33                      | 6         |
| <i>Enterobacter cloacae</i>           | 152.0                  | 0.488           | 3.5                       | 7         |
| <i>E. coli</i>                        | 115                    | 0.42            | 1.44                      | 8         |
| <i>Bacillus licheniformis</i>         | 30.76                  | 0.25            | 1.28                      | 9         |
| <i>Klebsiella pneumonia</i>           | 61                     | 0.36            | 0.51                      | 10        |
| <i>Serratia marcescens</i>            | 89.81                  | 0.35            | 1.91                      | 11        |
| <i>Klebsiella oxytoca</i>             | 106.7                  | 0.40            | 3.1                       | 12        |
| <i>B. licheniformis</i>               | 123.7                  | 0.565           | 2.95                      | This work |

<sup>a</sup> ND, not determined.

**Table S3** Microbial production of *meso*-2,3-BD.

| Strain                  | Concentration<br>(g/L) | Yield<br>(g/g) | Productivity<br>(g/[L h]) | Reference |
|-------------------------|------------------------|----------------|---------------------------|-----------|
| <i>E. coli</i>          | 4.2                    | 0.42           | 0.17                      | 13        |
| <i>E. coli</i>          | 1.12                   | 0.29           | 0.009                     | 14        |
| <i>E. coli</i>          | 14.1                   | 0.321          | 0.2                       | 15        |
| <i>E. coli</i>          | 15.7                   | 0.31           | 0.33                      | 16        |
| <i>E. coli</i>          | 13                     | 0.415          | 0.36                      | 17        |
| <i>E. coli</i>          | 73.8                   | 0.41           | 1.19                      | 18        |
| <i>S. marcescens</i>    | 152                    | 0.463          | 2.67                      | 19        |
| <i>E. coli</i>          | 17.7                   | 0.175          | 0.31                      | 20        |
| <i>B. licheniformis</i> | 90.1                   | 0.492          | 2.82                      | This work |

**Table S4** Scenarios of *meso*-2,3-BD production using *E. coli* BL21/pET-RABC and *B. licheniformis* MW3 ( $\Delta$ *gdh*)

| Description                                       | <i>E. coli</i> BL21/pET-RABC <sup>a</sup> |                   | <i>B. licheniformis</i> MW3 ( $\Delta$ <i>gdh</i> ) |                     |
|---------------------------------------------------|-------------------------------------------|-------------------|-----------------------------------------------------|---------------------|
|                                                   | Real                                      | Theoretical       | Real                                                | Theoretical         |
| Input bacteria (g) <sup>b</sup>                   |                                           | 0.12              |                                                     | 16.32               |
| Output bacteria (g) <sup>b</sup>                  |                                           | 4.21              |                                                     | 412.8               |
| Initial fermentation volume (L)                   |                                           | 0.8               |                                                     | 40                  |
| Final fermentation volume (L)                     |                                           | 0.8               |                                                     | 40                  |
| Input glucose (g)                                 |                                           | 151.2             |                                                     | 7580                |
| Final glucose concentration (g/L)                 |                                           | 9                 |                                                     | 6.5                 |
| Output glucose in final volume (g)                |                                           | 7.2               |                                                     | 260                 |
| Input nutrients in final volume (g)               |                                           | 12.50             |                                                     | 846                 |
| Output nutrients in final volume (g) <sup>c</sup> |                                           | 4.25 <sup>b</sup> |                                                     | 287.64 <sup>b</sup> |
| Mass of AC (g/L)                                  | 9.34                                      | 0                 | 3.6                                                 | 0                   |
| Mass of AC in total volume (g)                    | 7.47                                      | 0                 | 144                                                 | 0                   |

|                                                 |                    |                    |                    |                    |
|-------------------------------------------------|--------------------|--------------------|--------------------|--------------------|
| Mass of <i>meso</i> -2,3-BD (g/L)               | 73.8               | 90 <sup>d</sup>    | 90.1               | 91.5 <sup>d</sup>  |
| Mass of <i>meso</i> -2,3-BD in total volume (g) | 59.04              | 72                 | 3604               | 3660               |
| E-factor <sup>e</sup>                           | 0.392 <sup>f</sup> | 0.218 <sup>f</sup> | 0.306 <sup>f</sup> | 0.262 <sup>f</sup> |

---

<sup>a</sup> Xu et al. <sup>18</sup> for the fed-batch production of *meso*-2,3-BD using *E. coli* BL21/pET-RABC. <sup>b</sup> Dry cell weight was converted from optical density using the following equations: for *E. coli* BL21/pET-RABC, DCW (g/L) = 0.39 × OD 620 nm ; for *B. licheniformis* MW3 ( $\Delta$ *gdh*), DCW (g/L) = 0.48 × OD 620 nm .<sup>c</sup> For calculations the excess of nutrients was considered to be 34% like Matos et al.<sup>21</sup>. <sup>d</sup> Recalculated from 0.5 g *meso*-2,3-BD/g glucose. <sup>e</sup> E-factor=(mass of wastes)/(mass of products). <sup>f</sup> Calculated considering output of glucose, bacteria, nutrients and AC as a waste.

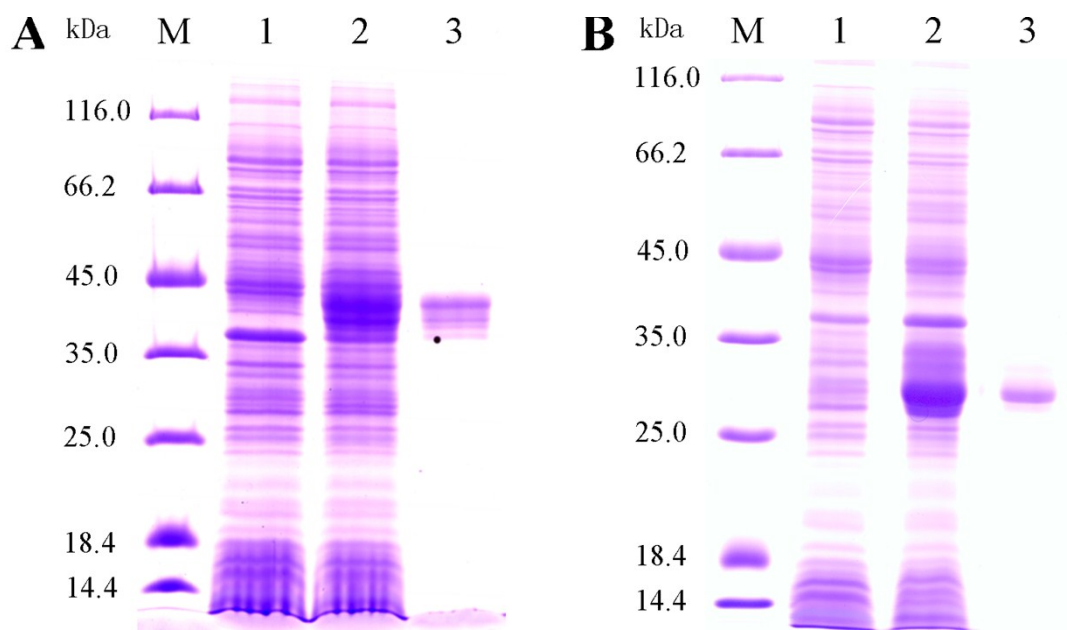

**Fig. S1.** SDS-PAGE of the purified 2*R*,3*R*-BDH and *meso*-BDH. A, SDS-PAGE analysis of the purified 2*R*,3*R*-BDH: lane M, marker; lane 1, crude extract of *E. coli* BL21 (DE3) (pET28a); lane 2, crude extract of *E. coli* BL21 (DE3) (pET28a-*gdh*); lane 3, purified 2*R*,3*R*-BDH. B, SDS-PAGE analysis of the purified *meso*-BDH: lane M, marker; lane 1, crude extract of *E. coli* BL21 (DE3) (pETDuet-1); lane 2, crude extract of *E. coli* BL21 (DE3) (pETDuet-*budC*); lane 3, purified *meso*-BDH.



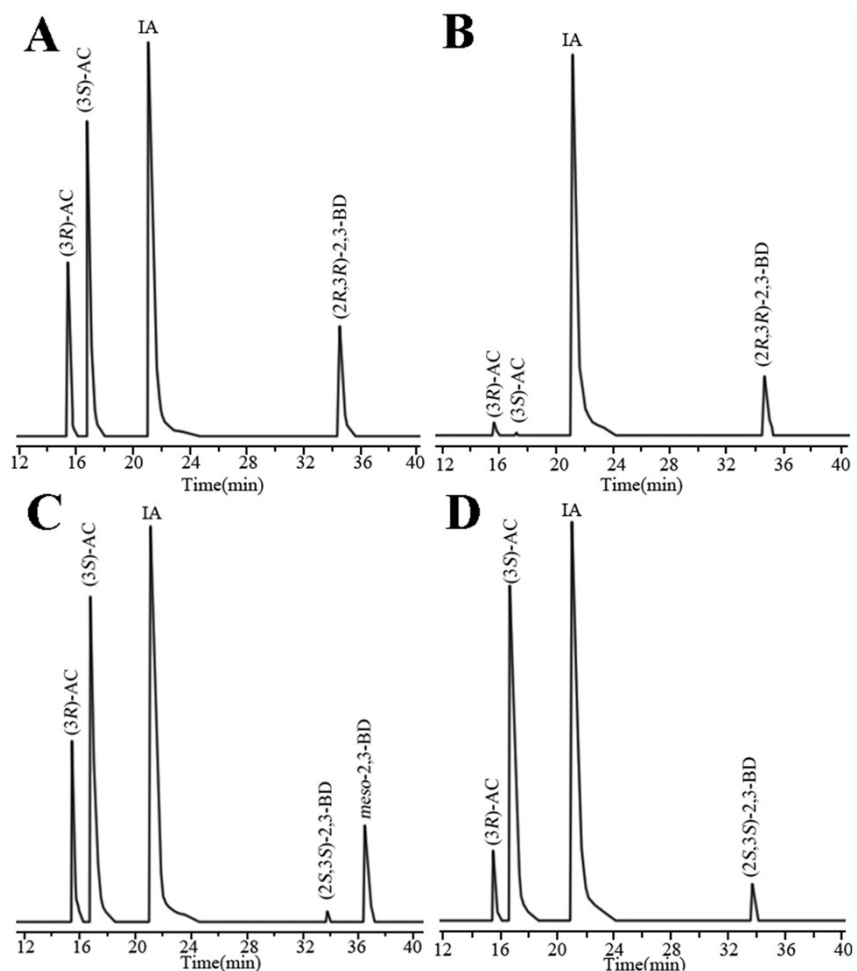

**Fig. S2.** GC analysis of the reaction products of 2*R*,3*R*-BDH (A, B) and *meso*-BDH (C, D). A, GC analysis of the 2*R*,3*R*-BDH catalyzed products of racemic AC with NADH as a cofactor. B, GC analysis of the 2*R*,3*R*-BDH catalyzed products of DA with NADH as a cofactor. C, GC analysis of the *meso*-BDH catalyzed products of racemic AC with NADH as a cofactor. D, GC analysis of the *meso*-BDH catalyzed products of DA with NADH as a cofactor. IA, Isoamyl alcohol was used as the internal standard.

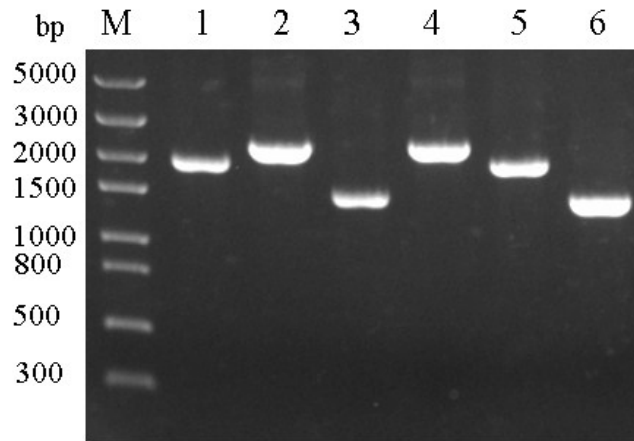

**Fig. S3.** PCR verification of recombinant strains. Lane M, marker; lane 1, fragment amplified from the genomic DNA of *B. licheniformis* MW3 using primers of  $\Delta budC$ -L-f and  $\Delta budC$ -R-r; lane 2, fragment amplified from the genomic DNA of *B. licheniformis* MW3 using primers of  $\Delta gdh$ -L-f and  $\Delta gdh$ -R-r; lane 3, fragment amplified from the genomic DNA of *B. licheniformis* MW3 ( $\Delta budC$ ) using primers of  $\Delta budC$ -L-f and  $\Delta budC$ -R-r; lane 4, fragment amplified from the genomic DNA of *B. licheniformis* MW3 ( $\Delta budC$ ) using primers of  $\Delta gdh$ -L-f and  $\Delta gdh$ -R-r; lane 5, fragment amplified from the genomic DNA of *B. licheniformis* MW3 ( $\Delta gdh$ ) using primers of  $\Delta budC$ -L-f and  $\Delta budC$ -R-r; lane 6, fragment amplified from the genomic DNA of *B. licheniformis* MW3 ( $\Delta gdh$ ) using primers of  $\Delta gdh$ -L-f and  $\Delta gdh$ -R-r.

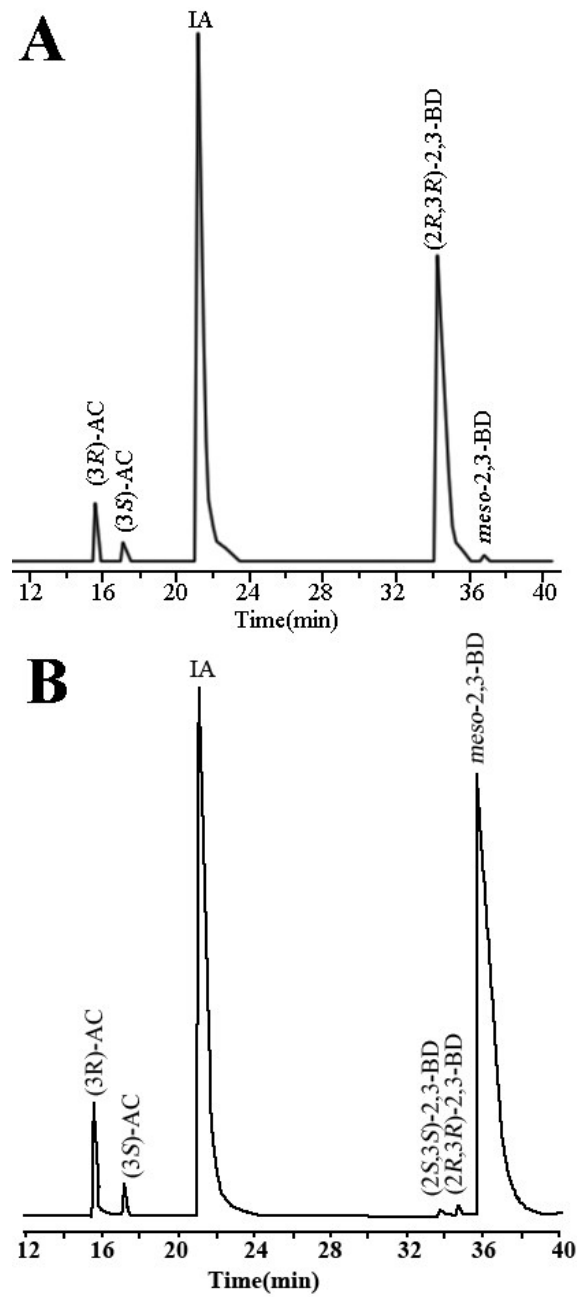

**Fig. S4.** GC analysis of the 2,3-BD produced by strain *B. licheniformis* MW3 ( $\Delta budC$ ) (A), *B. licheniformis* MW3 ( $\Delta gdh$ ) (B). IA, isoamyl alcohol was used as the internal standard.

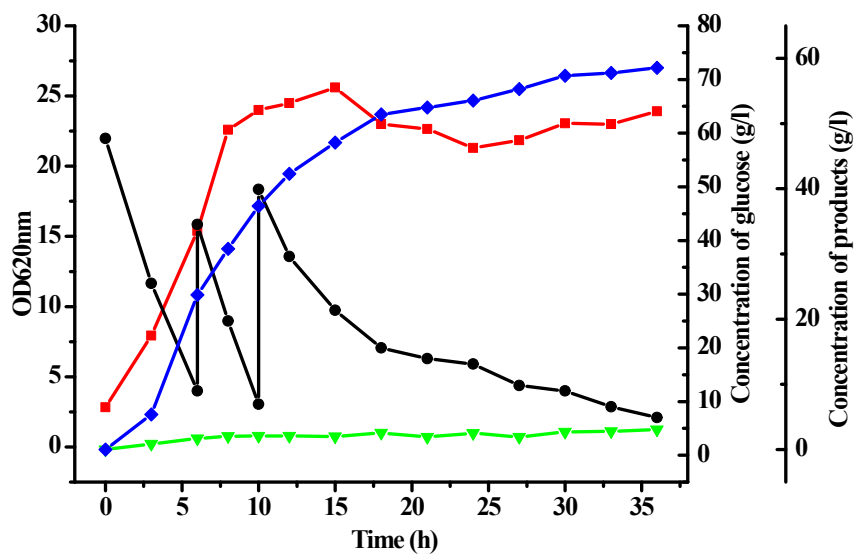

**Fig. S5.** Time-course of fed-batch fermentation by *B. licheniformis* MW3 ( $\Delta gdh$ ) in 1-

L bioreactor. ●, Glucose; ■, OD620 nm; ◆, 2,3-BD; ▼, AC.

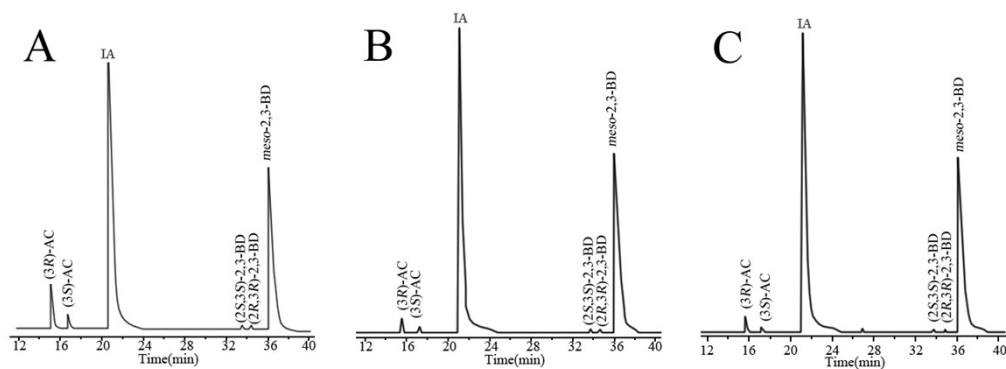

**Fig. S6.** GC analysis of the *meso*-2,3-BD produced by strain *B. licheniformis* MW3 ( $\Delta$ *gdh*) in 1-L (A), 5-L (B), and 50-L (C) bioreactor. IA, Isoamyl alcohol was used as the internal standard.

## References

1. T. Häßler, D. Schieder, R. Pfaller, M. Faulstich and V. Sieber, *Bioresour. Technol.*, 2012, **124**, 237–244.
2. Y. Yan, C. C. Lee and J. C. Liao, *Org. Biomol. Chem.*, 2009, **7**, 3914–3917.
3. M. A. Siemerink, W. Kuit, A. M. L. Contreras, G. Eggink, J. van der Oost and S. W. Kengen, *Appl. Environ. Microbiol.*, 2011, **77**, 2582–2588.
4. X. Shen, Y. Lin, R. Jain, Q. Yuan and Y. Yan, *J. Ind. Microbiol. Biotechnol.*, 2012, **39**, 1725–1729.
5. S. J. Kim, S. O. Seo, Y.-C. Park, Y. S. Jin and J. H. Seo, *J. Biotechnol.*, 2014, **192**, 376–382.
6. J. Lian, R. Chao and H. Zhao, *Metab. Eng.*, 2014, **23**, 92–99.
7. L. Li, K. Li, Y. Wang, C. Chen, Y. Xu, L. Zhang, B. Han, C. Gao, F. Tao and C. Ma, *Metab. Eng.*, 2015, **28**, 19–27
8. X. J. Ji, L. G. Liu, M. Q. Shen, Z. K. Nie, Y. J. Tong and H. Huang, *Biotechnol. Bioeng.*, 2015, **112**, 1056–1059.
9. G. Qi, Y. Kang, L. Li, A. Xiao, S. Zhang, Z. Wen, D. Xu and S. Chen, *Biotechnol. Biofuels*, 2014, **7**, 16.
10. S. Lee, B. Kim, J. Yang, D. Jeong, S. Park and J. Lee, *J. Biotechnol.*, 2015, **209**, 7–13.
11. F. Bai, L. Dai, J. Fan, N. Truong, B. Rao, L. Zhang and Y. Shen, *J. Ind. Microbiol. Biotechnol.*, 2015, **42**, 779–786.
12. J. M. Park, C. Rathnasingh and H. Song, *J. Ind. Microbiol. Biotechnol.*, 2015, **42**, 1–7.
13. H. D. Shin, S. H. Yoon, J. Wu, C. Rutter, S. W. Kim and R. R. Chen, *Bioresour. Technol.*, 2012, **118**, 367–373.

14. D. R. Nielsen, S. H. Yoon, C. J. Yuan and K. L. Prather, *Biotechnol. J.*, 2010, **5**, 274–284.
15. S. Mazumdar, J. Lee and M.-K. Oh, *Bioresour. Technol.*, 2013, **136**, 329–336.
16. S. Lee, B. Kim, K. Park, Y. Um and J. Lee, *Appl. Biochem. Biotechnol.*, 2012, **166**, 1801–1813.
17. Z. J. Li, J. Jian, X. X. Wei, X. W. Shen and G. Q. Chen, *Appl. Microbiol. Biotechnol.*, 2010, **87**, 2001–2009.
18. Y. Xu, H. Chu, C. Gao, F. Tao, Z. Zhou, K. Li, L. Li, C. Ma and P. Xu, *Metab. Eng.*, 2014, **23**, 22–33.
19. L. Zhang, J. A. Sun, Y. Hao, J. Zhu, J. Chu, D. Wei and Y. Shen, *J. Ind. Microbiol. Biotechnol.*, 2010, **37**, 857–862.
20. S. Ui, Y. Okajima, A. Mimura, H. Kanai and T. Kudo, *J. Ferment. Bioeng.*, 1997, **84**, 185–189.
21. C. T. Matos, L. Gouveia, A. R. C. Morais, A. Reis and R. Bogel-Lukasik, *Green Chem.*, 2013, **15**, 2854–2864.
